# Supplementary material for: Bimetallic MOF-based catalysts with enhanced activity for electrochemical hydrogen evolution in acid and alkaline electrolytes
Source: Royal Society of Chemistry journal article supplement (doi:10.1039/d4qi01533a), 2024-01-01
Supplement: d4qi01533a1.pdf [file d4qi01533a1.pdf]

## Electronic Supplementary Information

### **Bimetallic MOF-based catalysts with enhanced activity for electrochemical hydrogen evolution in acid and alkaline electrolytes**

Rui-Zhe Zhang<sup>a,b\*</sup>, Lele Lu<sup>a</sup>, Peng Cheng<sup>a</sup> and Wei Shi<sup>a\*</sup>

<sup>a</sup>Frontiers Science Center for New Organic Matter, Key Laboratory of Advanced Energy Materials Chemistry (MOE), State Key Laboratory of Advanced Chemical Power Sources, College of Chemistry, Nankai University, Tianjin 300071, China

<sup>b</sup>School of Chemistry and Pharmaceutical Engineering, Shandong First Medical University & Shandong Academy of Medical Sciences, Jinan 250000, China

## Contents

|                   |                                                                                                                                                                                                                             |     |
|-------------------|-----------------------------------------------------------------------------------------------------------------------------------------------------------------------------------------------------------------------------|-----|
| <b>Table S1</b>   | MOF-based HER electrocatalysts applied in acidic electrolyte.                                                                                                                                                               | S3  |
| <b>Table S2</b>   | MOF-based HER electrocatalysts applied in alkaline electrolyte.                                                                                                                                                             | S4  |
| <b>Fig. S1</b>    | Thermogravimetric analysis of Ni-NKU-100 and $M_xNi_{1-x}$ -NKU-100 (M = Mn, Fe, Co, Cu, Zn).                                                                                                                               | S5  |
| <b>Fig. S2</b>    | SEM images of Ni-NKU-100, $Cu_{0.16}Ni_{0.84}$ -NKU-100 and $Fe_{0.24}Ni_{0.76}$ -NKU-100.                                                                                                                                  | S6  |
| <b>Fig. S3</b>    | SEM images and EDS elemental mappings of $Mn_{0.14}Ni_{0.86}$ -NKU-100 (a), $Fe_{0.24}Ni_{0.76}$ -NKU-100 (b), $Co_{0.18}Ni_{0.82}$ -NKU-100 (c), $Cu_{0.16}Ni_{0.84}$ -NKU-100 (d), and $Zn_{0.18}Ni_{0.82}$ -NKU-100 (e). | S7  |
| <b>Fig. S4</b>    | LSV curves and EIS Nyquist plots of $M_xNi_{1-x}$ -NKU-100 (M = Mn, Fe, Co, Cu, Zn) in 0.5 M $H_2SO_4$ electrolyte.                                                                                                         | S8  |
| <b>Fig. S5</b>    | The equivalent circuit for fitting electrochemical impedance.                                                                                                                                                               | S9  |
| <b>Table S3</b>   | $R_{ct}$ of $Cu_xNi_{1-x}$ -NKU-100 in 0.5 M $H_2SO_4$ electrolyte.                                                                                                                                                         | S10 |
| <b>Fig. S6</b>    | CV curves of Ni-NKU-100 and $Cu_xNi_{1-x}$ -NKU-100 at the scan rate range from 20 to 200 $mV s^{-1}$ in 0.5 M $H_2SO_4$ electrolyte.                                                                                       | S11 |
| <b>Fig. S7</b>    | SEM images of $Cu_{0.22}Ni_{0.78}$ -NKU-100 after long-time electrocatalytic test in 0.5 M $H_2SO_4$ electrolyte.                                                                                                           | S12 |
| <b>Fig. S8</b>    | XPS wide spectra for Ni-NKU-100 and $Cu_xNi_{1-x}$ -NKU-100.                                                                                                                                                                | S13 |
| <b>Fig. S9</b>    | High-resolution XPS of Ni 2p for $Cu_xNi_{1-x}$ -NKU-100.                                                                                                                                                                   | S14 |
| <b>Fig. S10</b>   | High-resolution XPS of Cu 2p for $Cu_xNi_{1-x}$ -NKU-100.                                                                                                                                                                   | S15 |
| <b>Fig. S11</b>   | High-resolution XPS of C 1s for $Cu_xNi_{1-x}$ -NKU-100.                                                                                                                                                                    | S16 |
| <b>Fig. S12</b>   | High-resolution XPS of O 1s for $Cu_xNi_{1-x}$ -NKU-100.                                                                                                                                                                    | S17 |
| <b>Fig. S13</b>   | LSV curves and EIS Nyquist plots of $M_xNi_{1-x}$ -NKU-100 (M = Mn, Fe, Co, Cu, Zn) in 1 M NaOH electrolyte.                                                                                                                | S18 |
| <b>Fig. S14</b>   | CV curves of Ni-NKU-100 and $Fe_xNi_{1-x}$ -NKU-100 at the scan rate range from 20 to 200 $mV s^{-1}$ in 1 M NaOH electrolyte.                                                                                              | S19 |
| <b>Table S4</b>   | $R_{ct}$ of $Fe_xNi_{1-x}$ -NKU-100 in 1 M NaOH electrolyte.                                                                                                                                                                | S20 |
| <b>Fig. S15</b>   | SEM images of $Fe_{0.24}Ni_{0.76}$ -NKU-100 after long-time electrocatalytic test in 1 M NaOH electrolyte.                                                                                                                  | S21 |
| <b>Fig. S16</b>   | XPS wide spectra for Ni-NKU-100 and $Cu_xNi_{1-x}$ -NKU-100.                                                                                                                                                                | S22 |
| <b>Fig. S17</b>   | High-resolution XPS of Ni 2p for $Fe_xNi_{1-x}$ -NKU-100.                                                                                                                                                                   | S23 |
| <b>Fig. S18</b>   | High-resolution XPS of Fe 2p for $Fe_xNi_{1-x}$ -NKU-100.                                                                                                                                                                   | S24 |
| <b>Fig. S19</b>   | High-resolution XPS of C 1s for $Fe_xNi_{1-x}$ -NKU-100.                                                                                                                                                                    | S25 |
| <b>Fig. S20</b>   | High-resolution XPS of O 1s for $Fe_xNi_{1-x}$ -NKU-100.                                                                                                                                                                    | S26 |
| <b>References</b> |                                                                                                                                                                                                                             | S27 |

**Table S1.** MOF-based HER electrocatalysts applied in acidic electrolyte.

| Catalysts                                      | Categories       | $\eta_{10}$<br>(mV) | Electrolyte                                                      | Stability | Reference |
|------------------------------------------------|------------------|---------------------|------------------------------------------------------------------|-----------|-----------|
| Ni-NKU-100                                     | 3D MOF           | 224                 | 0.5 M H <sub>2</sub> SO <sub>4</sub>                             | 24 h      | This work |
| Cu <sub>0.22</sub> Ni <sub>0.78</sub> -NKU-100 |                  |                     |                                                                  |           |           |
| Co-MOF                                         | 3D MOF           | 357                 | 0.5 M H <sub>2</sub> SO <sub>4</sub>                             | 96 h      | [1]       |
| Co-MOF                                         | 3D MOF           | 223                 | 0.5 M H <sub>2</sub> SO <sub>4</sub>                             | 72 h      | [2]       |
| THAT-Co-single layer                           |                  | 283                 |                                                                  |           |           |
| THTA-Co-powder                                 | 2D MOF           | 332                 | 0.5 M H <sub>2</sub> SO <sub>4</sub>                             | 4 h       | [3]       |
| THTA-Co-graphene                               |                  | 230                 |                                                                  |           |           |
| CTGU-9                                         | 3D MOF           | 424                 | 0.5 M H <sub>2</sub> SO <sub>4</sub>                             | 21 h      | [4]       |
| AB: CTGU-9=3: 4                                |                  |                     |                                                                  |           |           |
| UU-100(Co)                                     | 3D MOF           | 450                 | NaClO <sub>4</sub> (0.1 M)/<br>acetate (0.2 M) buffer<br>at pH 4 | ~5 h      | [5]       |
| THT-Ni                                         | 2D MOF           | 333                 | 0.5 M H <sub>2</sub> SO <sub>4</sub>                             |           | [6]       |
| Cu-MOF                                         | 3D MOF           | 440                 | 1 M H <sub>2</sub> SO <sub>4</sub>                               |           | [7]       |
| NENU-5                                         |                  | 585                 |                                                                  |           |           |
| HKUST-1                                        |                  | 691                 |                                                                  |           |           |
| NENU-500                                       | 3D MOF           | 237                 | 0.5 M H <sub>2</sub> SO <sub>4</sub>                             |           | [8]       |
| NENU-501                                       |                  | 392                 |                                                                  |           |           |
| NENU-499                                       |                  | 570                 |                                                                  |           |           |
| $\epsilon(\text{trim})_{4/3}$                  |                  | 515                 |                                                                  |           |           |
| NU-1000                                        | 3D MOF           | 640                 |                                                                  |           |           |
| NU-1000_Ni-S                                   | 3D MOF + sulfide | 238                 | 0.1 M HCl                                                        | 2 h       | [9]       |
| bulk NiFe-MOF                                  |                  | 196                 |                                                                  |           |           |
| HKUST-1 ED                                     | 3D MOF           | 590                 | 0.5 M H <sub>2</sub> SO <sub>4</sub>                             | 2 h       | [10]      |
| HKUST-1 HT                                     |                  | 660                 |                                                                  |           |           |
| Ni-NKU-100                                     | 3D MOF           | 324                 | 0.5 M H <sub>2</sub> SO <sub>4</sub>                             | 24 h      | [11]      |
| Cu <sub>0.19</sub> Ni <sub>0.81</sub> -NKU-101 |                  |                     |                                                                  |           |           |

**Table S2.** MOF-based HER electrocatalysts applied in alkaline electrolyte.

| Catalysts                                              | Categories       | $\eta_{10}$<br>(mV) | Electrolyte | Stability | Reference |
|--------------------------------------------------------|------------------|---------------------|-------------|-----------|-----------|
| Ni-NKU-100                                             | 3D MOF           | 249                 | 1 M KOH     | 24 h      | This work |
| Fe <sub>0.24</sub> Ni <sub>0.76</sub> -NKU-100         |                  |                     |             |           |           |
| Co-BDC                                                 | 2D MOF           | 529                 | 1 M KOH     | 15 h      | [12]      |
| Co-BDC-MoS <sub>2</sub>                                | 2D MOF + sulfide | 248                 |             |           |           |
| NiFe-MOF                                               | 3D MOF           | 134                 | 0.1 M KOH   | 5.5 h     | [13]      |
| Ni-MOF                                                 |                  | 177                 |             |           |           |
| bulk NiFe-MOF                                          |                  | 196                 |             |           |           |
| Co-BTC/CC                                              | 3D MOF           | 437                 | 1 M KOH     |           | [14]      |
| CuCo-CAT                                               | 3D MOF           | 52                  | 1 M KOH     | 10 h      | [15]      |
| Fe(OH) <sub>x</sub> @Cu-MOF                            | 3D MOF           | 112                 | 1 M KOH     | 30 h      | [16]      |
| Fe <sub>2</sub> Zn-MOF                                 | 3D MOF           | 221                 | 0.1 M KOH   | 24 h      | [17]      |
| Ni <sub>3</sub> (Ni <sub>3</sub> -HAHATN) <sub>2</sub> | 3D MOF           | 115                 | 0.1 M KOH   | 10 h      | [18]      |

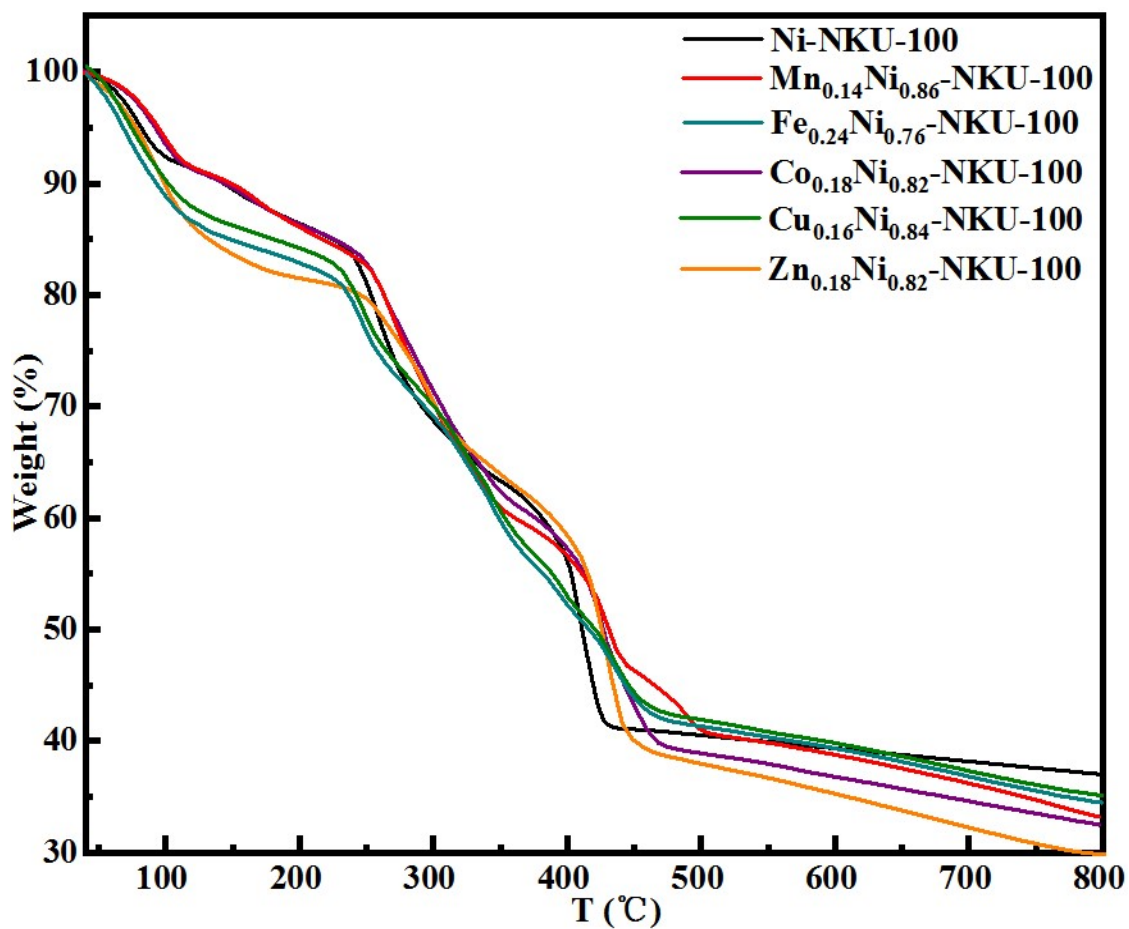

Fig. S1 Thermogravimetric analysis of Ni-NKU-100 and  $M_xNi_{1-x}$ -NKU-100 (M = Mn, Fe, Co, Cu, Zn).

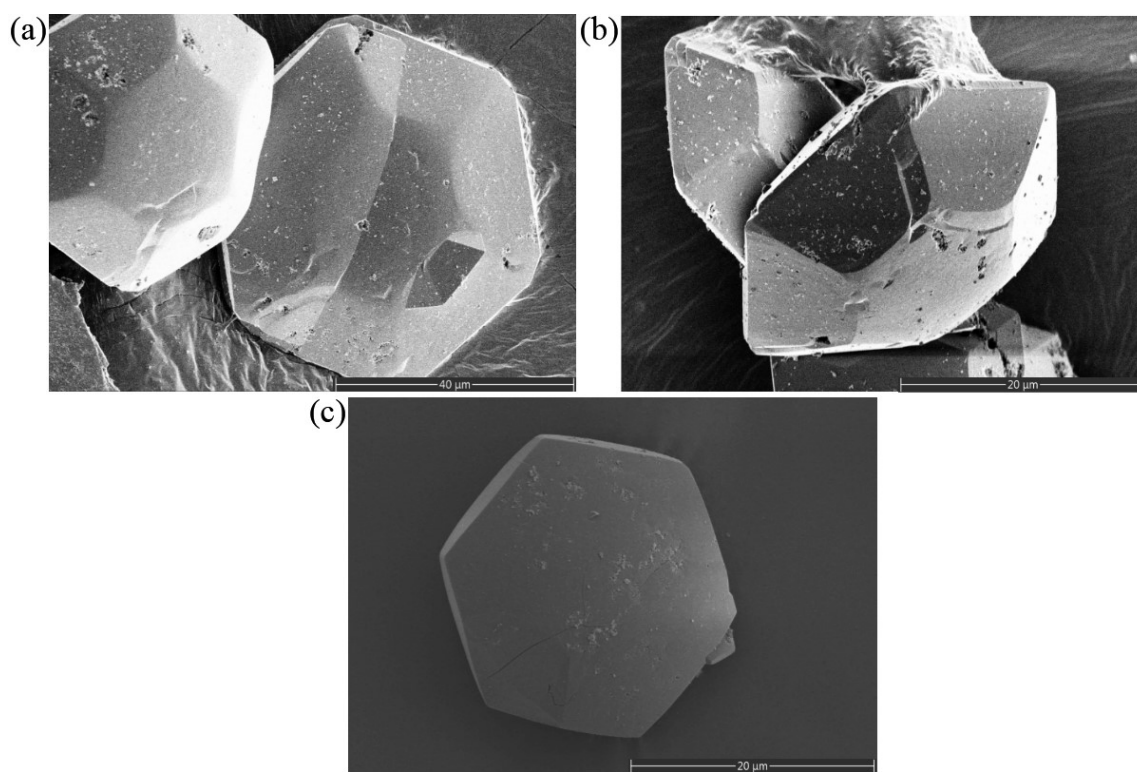

**Fig. S2** FESEM images of Ni-NKU-100 (a),  $\text{Cu}_{0.16}\text{Ni}_{0.84}\text{-NKU-100}$  (b) and  $\text{Fe}_{0.24}\text{Ni}_{0.76}\text{-NKU-100}$  (c).

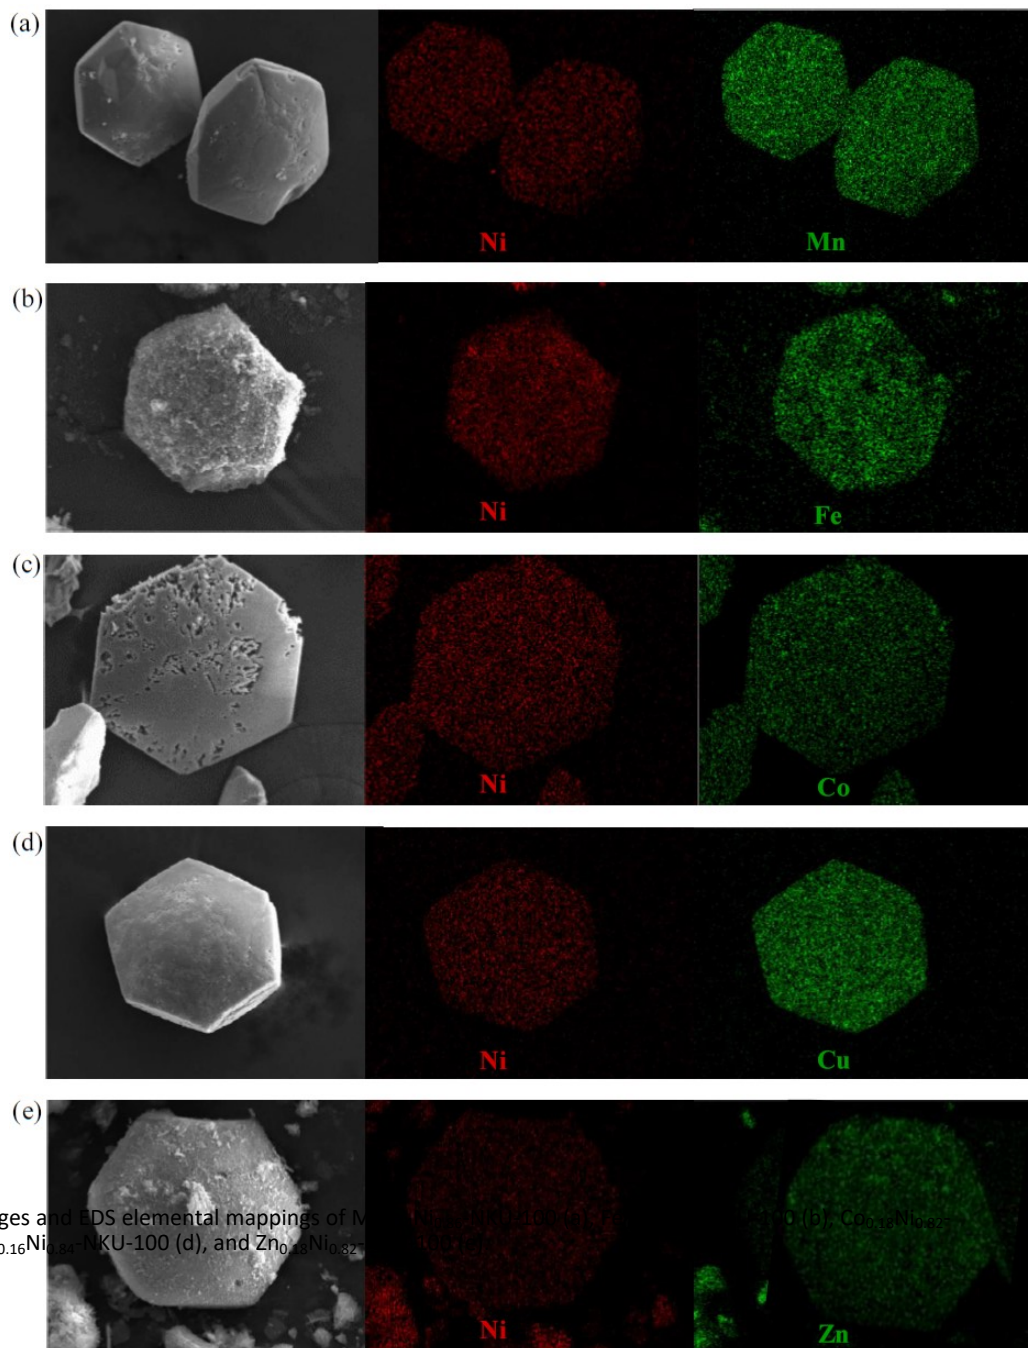

**Fig. S3** SEM images and EDS elemental mappings of  $\text{Ni}_{0.16}\text{Ni}_{0.16}\text{Ni}_{0.16}\text{-NiKU-100}$  (a),  $\text{Cu}_{0.16}\text{Ni}_{0.16}\text{Ni}_{0.16}\text{-NiKU-100}$  (b),  $\text{Cu}_{0.16}\text{Ni}_{0.16}\text{Ni}_{0.16}\text{-NiKU-100}$  (c),  $\text{Cu}_{0.16}\text{Ni}_{0.16}\text{Ni}_{0.16}\text{-NiKU-100}$  (d), and  $\text{Zn}_{0.16}\text{Ni}_{0.16}\text{Ni}_{0.16}\text{-NiKU-100}$  (e).

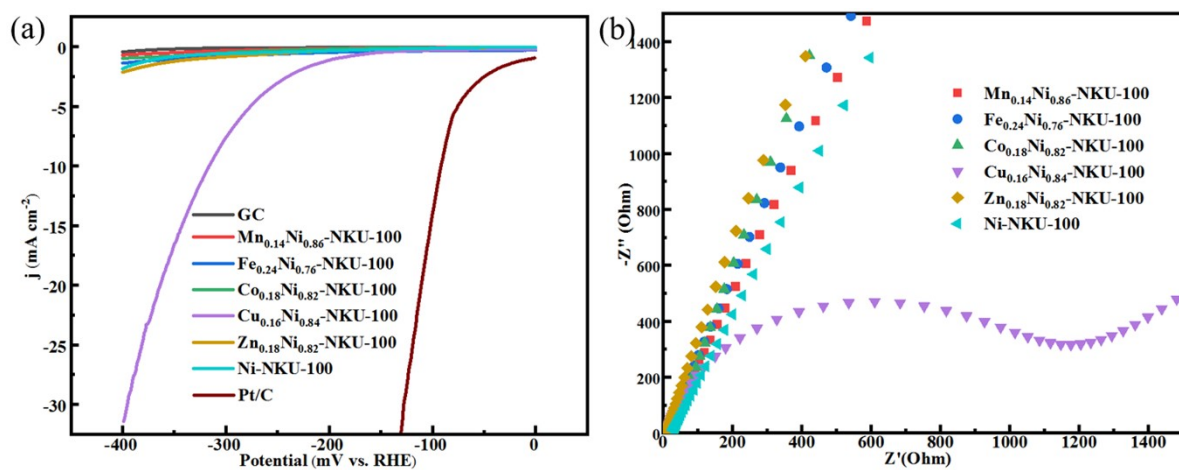

**Fig. S4** (a) LSV curves at a scan rate of 5 mV·s<sup>-1</sup> and (b) EIS Nyquist plots of M<sub>x</sub>Ni<sub>1-x</sub>-NKU-100 (M = Mn, Fe, Co, Cu, Zn) in 0.5 M H<sub>2</sub>SO<sub>4</sub> electrolyte.



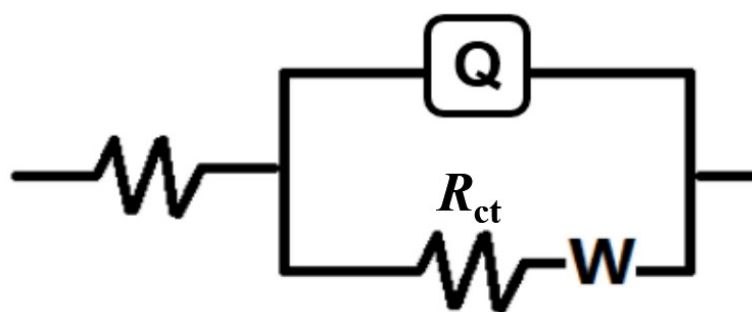

Fig. S5 The equivalent circuit for fitting electrochemical impedance.

**Table S3**  $R_{ct}$  of  $\text{Cu}_x\text{Ni}_{1-x}$ -NKU-100 in 0.5 M  $\text{H}_2\text{SO}_4$  electrolyte.

| Electrode material                          | $R_{ct}$ ( $\Omega$ ) |
|---------------------------------------------|-----------------------|
| Ni-NKU-100                                  | 86500                 |
| $\text{Cu}_{0.09}\text{Ni}_{0.91}$ -NKU-100 | 53400                 |
| $\text{Cu}_{0.11}\text{Ni}_{0.89}$ -NKU-100 | 3729                  |
| $\text{Cu}_{0.16}\text{Ni}_{0.84}$ -NKU-100 | 2768                  |
| $\text{Cu}_{0.22}\text{Ni}_{0.78}$ -NKU-100 | 702                   |
| $\text{Cu}_{0.25}\text{Ni}_{0.75}$ -NKU-100 | 1066                  |

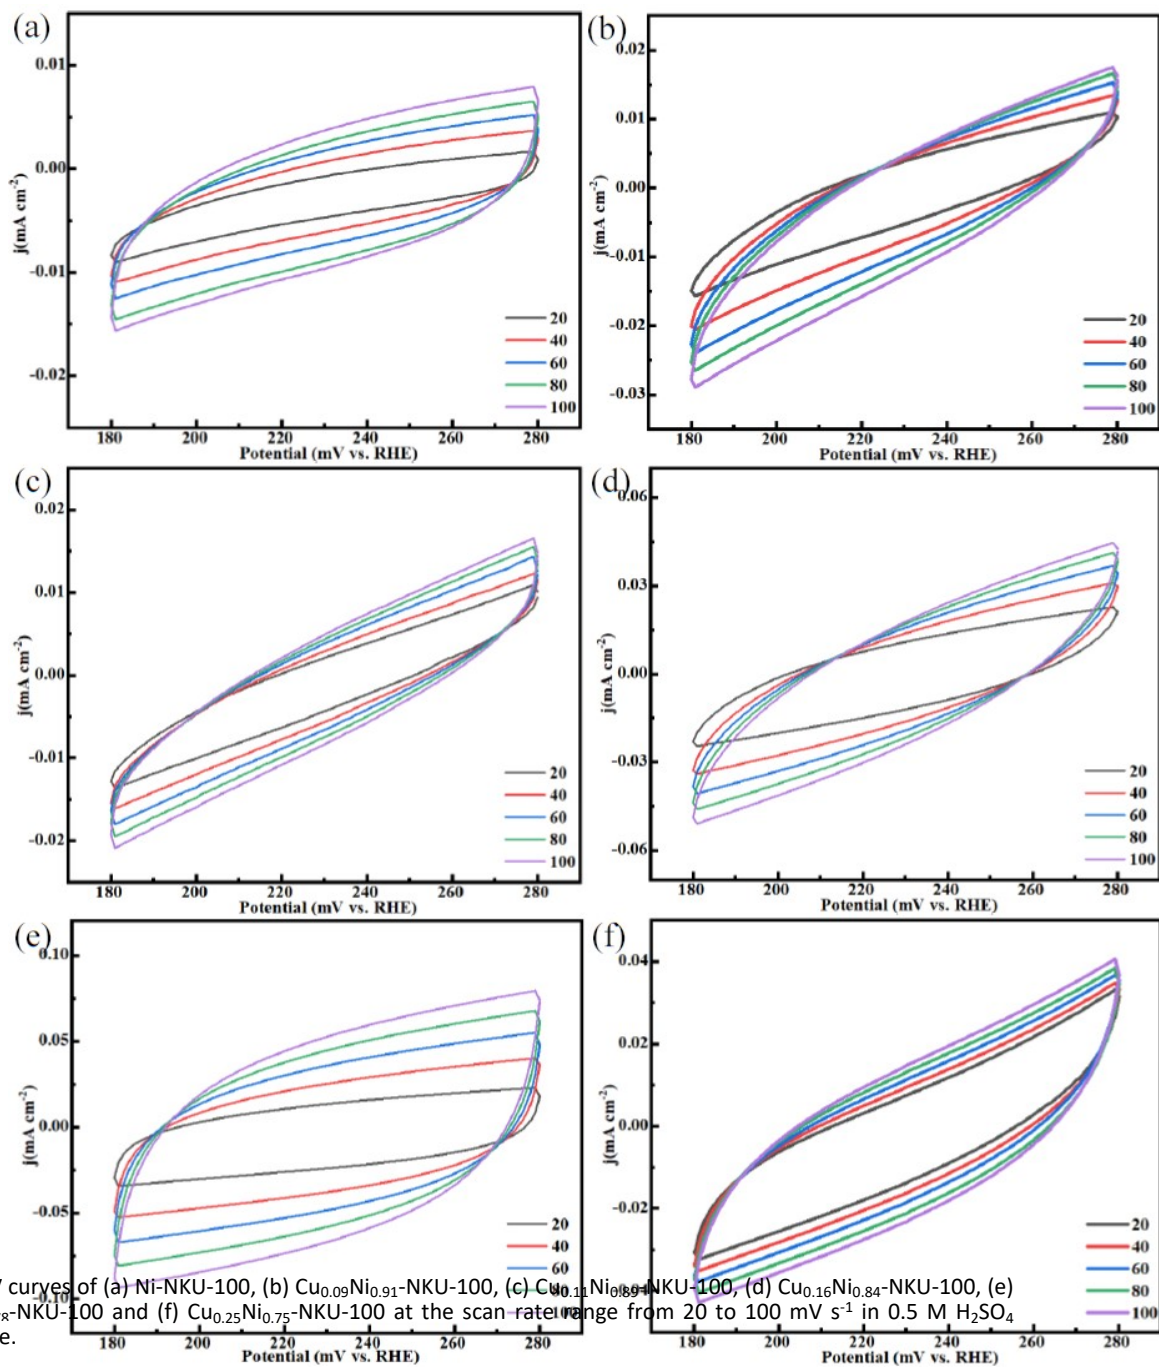

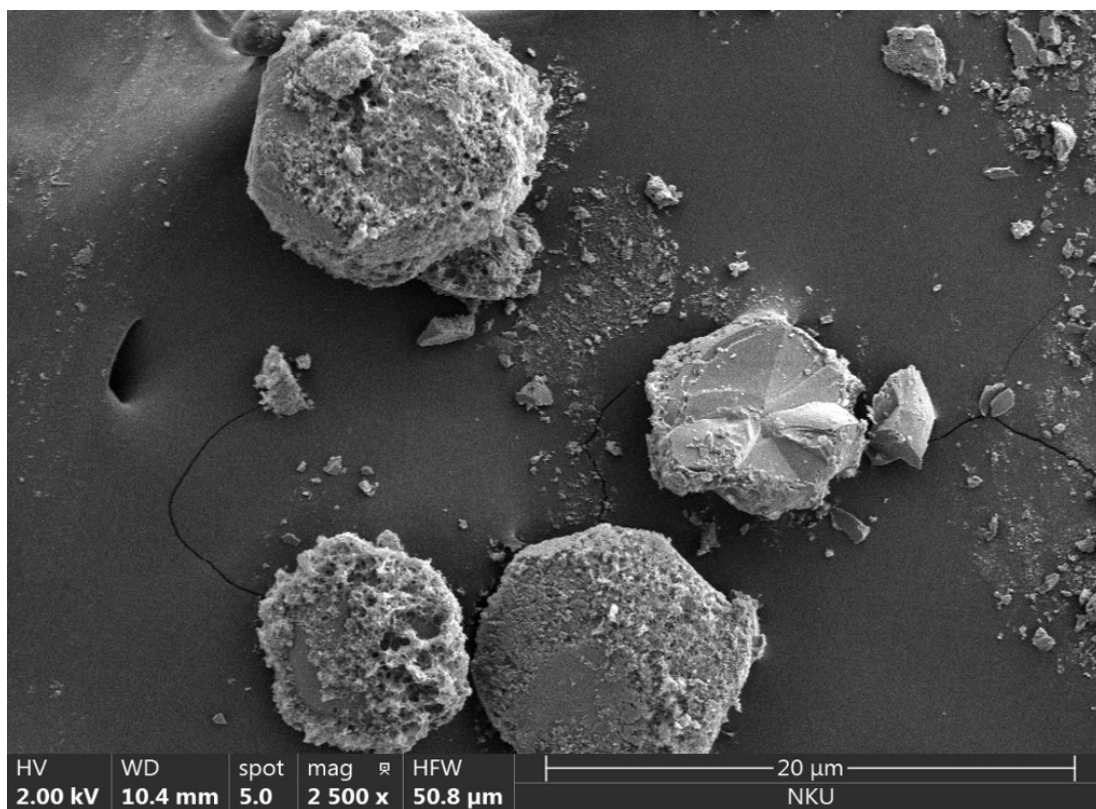

**Fig. S7** SEM images of  $\text{Cu}_{0.22}\text{Ni}_{0.78}\text{-NKU-100}$  after long-time electrocatalytic test in  $0.5 \text{ M H}_2\text{SO}_4$  electrolyte.

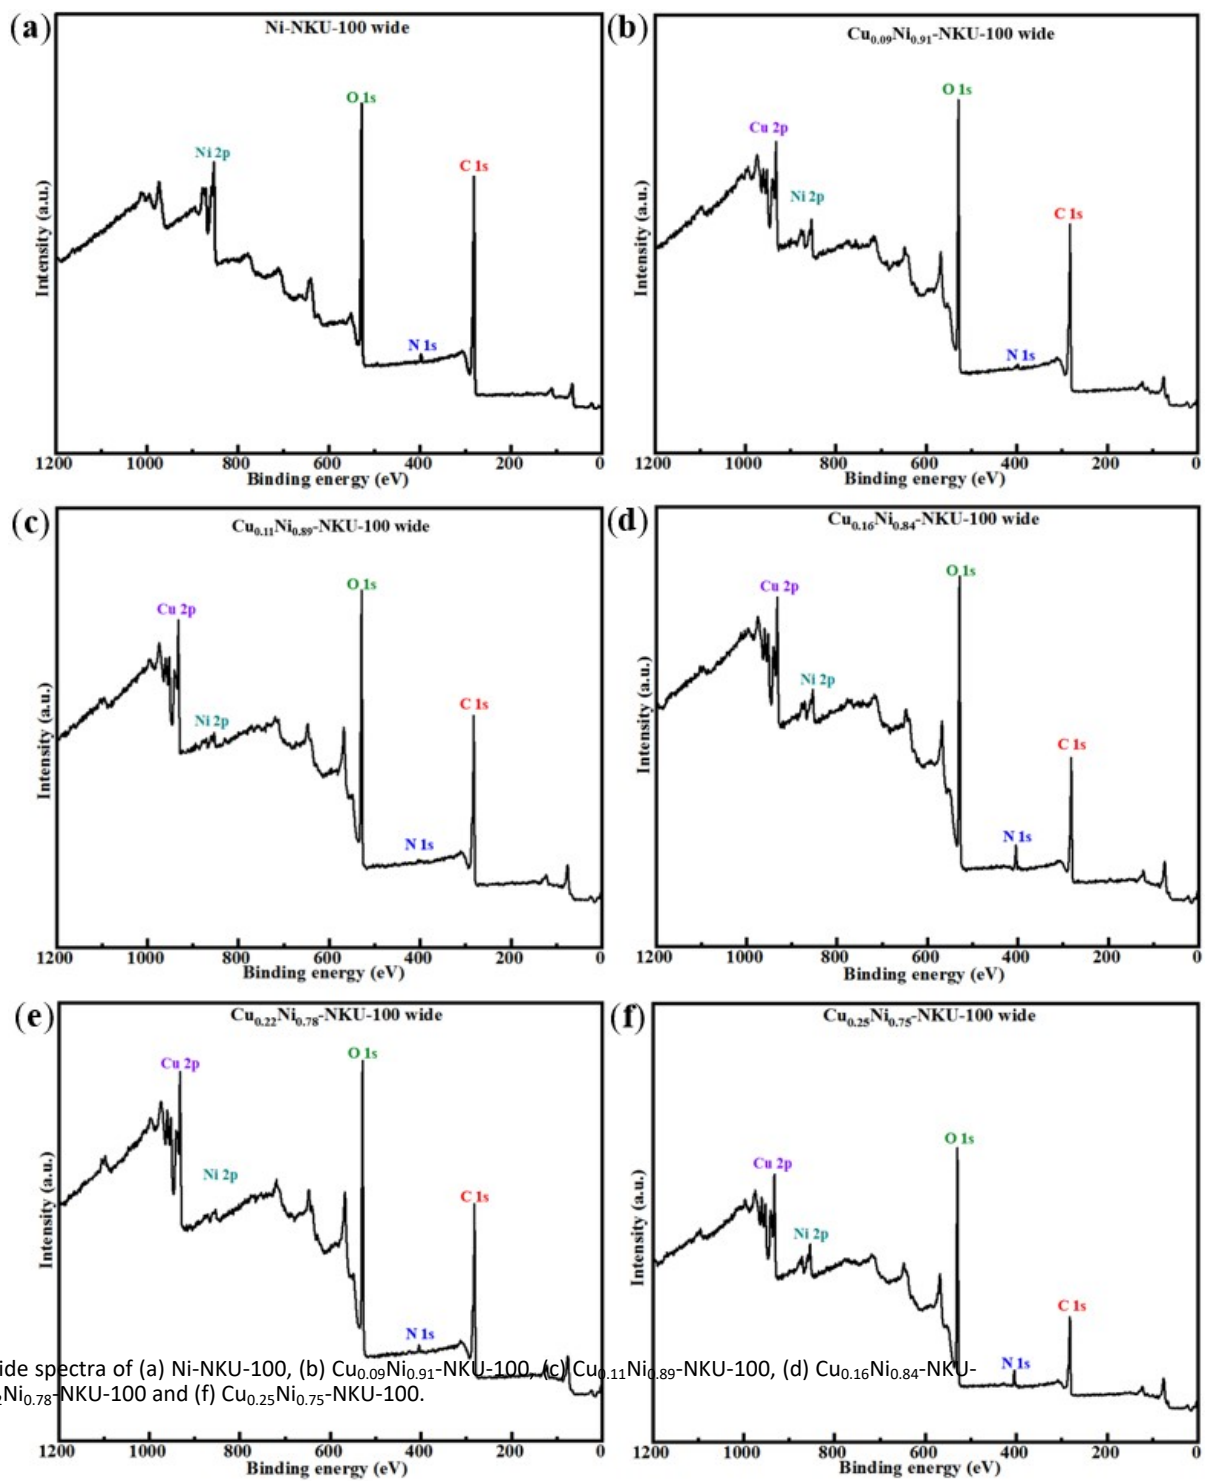

**Fig. S8** XPS wide spectra of (a) Ni-NKU-100, (b)  $\text{Cu}_{0.09}\text{Ni}_{0.91}$ -NKU-100, (c)  $\text{Cu}_{0.11}\text{Ni}_{0.89}$ -NKU-100, (d)  $\text{Cu}_{0.16}\text{Ni}_{0.84}$ -NKU-100, (e)  $\text{Cu}_{0.22}\text{Ni}_{0.78}$ -NKU-100 and (f)  $\text{Cu}_{0.25}\text{Ni}_{0.75}$ -NKU-100.

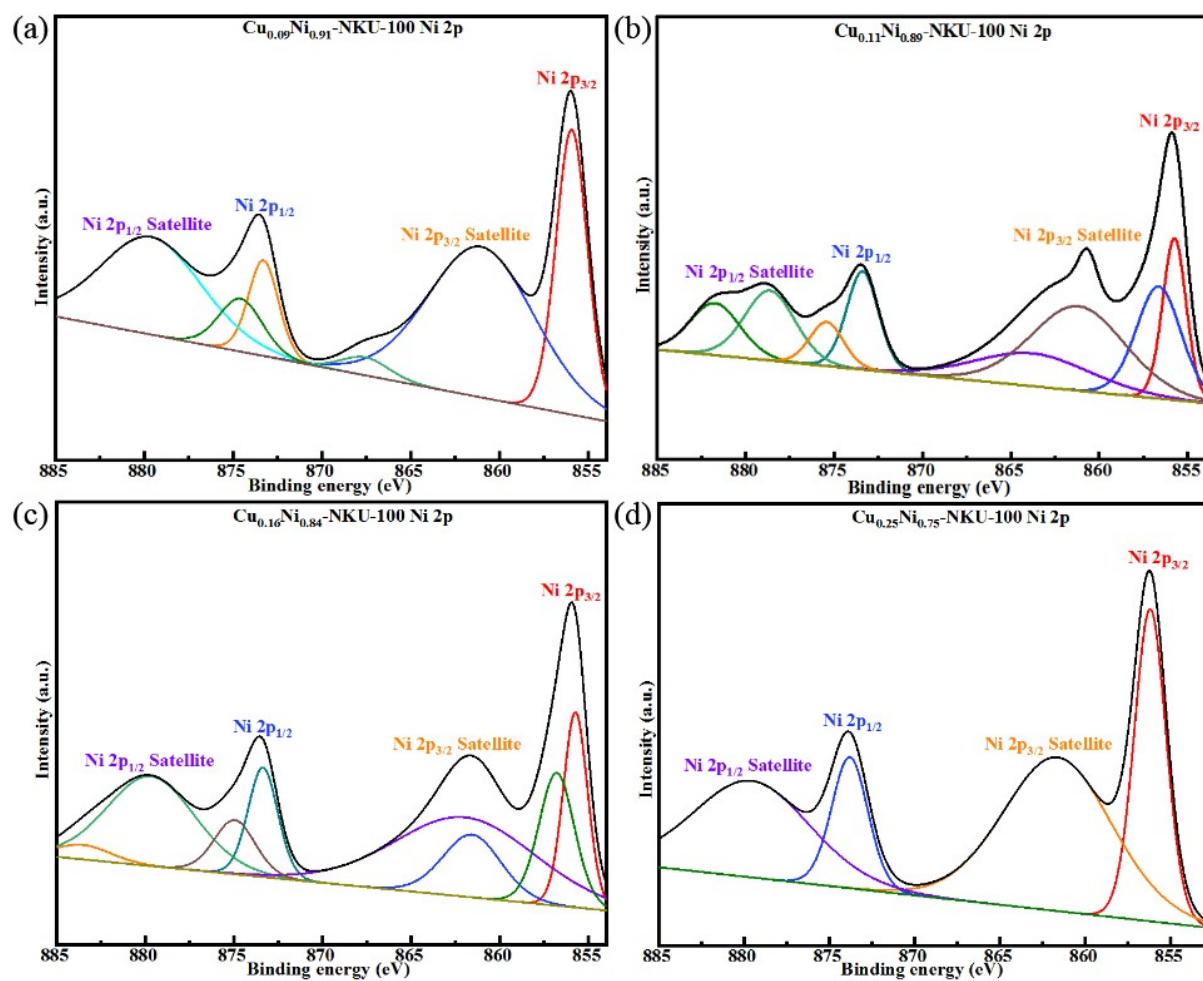

**Fig. S9** High-resolution XPS of Ni 2p for (a)  $\text{Cu}_{0.09}\text{Ni}_{0.91}\text{-NKU-100}$ , (b)  $\text{Cu}_{0.11}\text{Ni}_{0.89}\text{-NKU-100}$ , (c)  $\text{Cu}_{0.16}\text{Ni}_{0.84}\text{-NKU-100}$  and (d)  $\text{Cu}_{0.25}\text{Ni}_{0.75}\text{-NKU-100}$ .

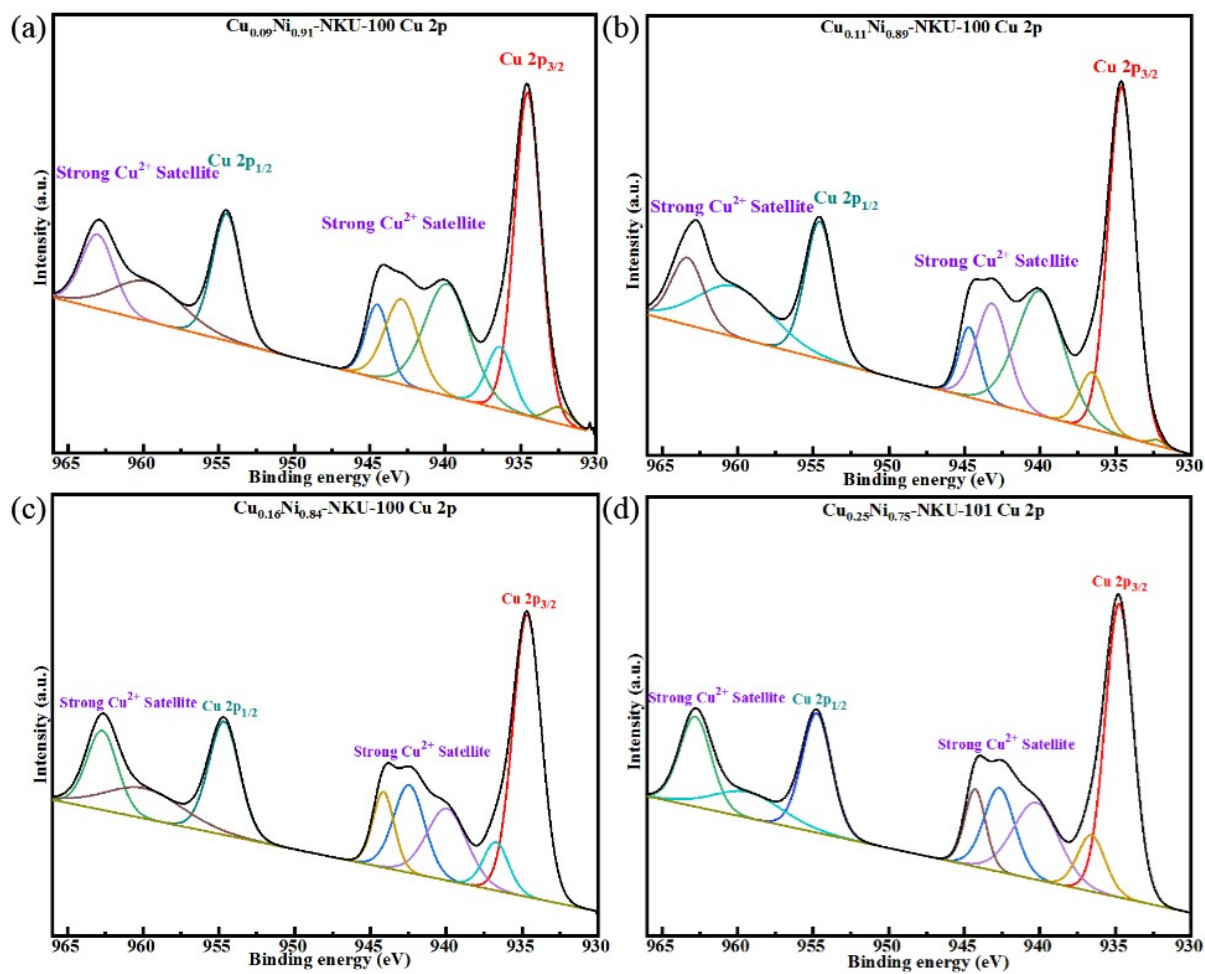

**Fig. S10** High-resolution XPS of Cu 2p for (a)  $\text{Cu}_{0.09}\text{Ni}_{0.91}\text{-NKU-100}$ , (b)  $\text{Cu}_{0.11}\text{Ni}_{0.89}\text{-NKU-100}$ , (c)  $\text{Cu}_{0.16}\text{Ni}_{0.84}\text{-NKU-100}$  and (d)  $\text{Cu}_{0.25}\text{Ni}_{0.75}\text{-NKU-100}$ .

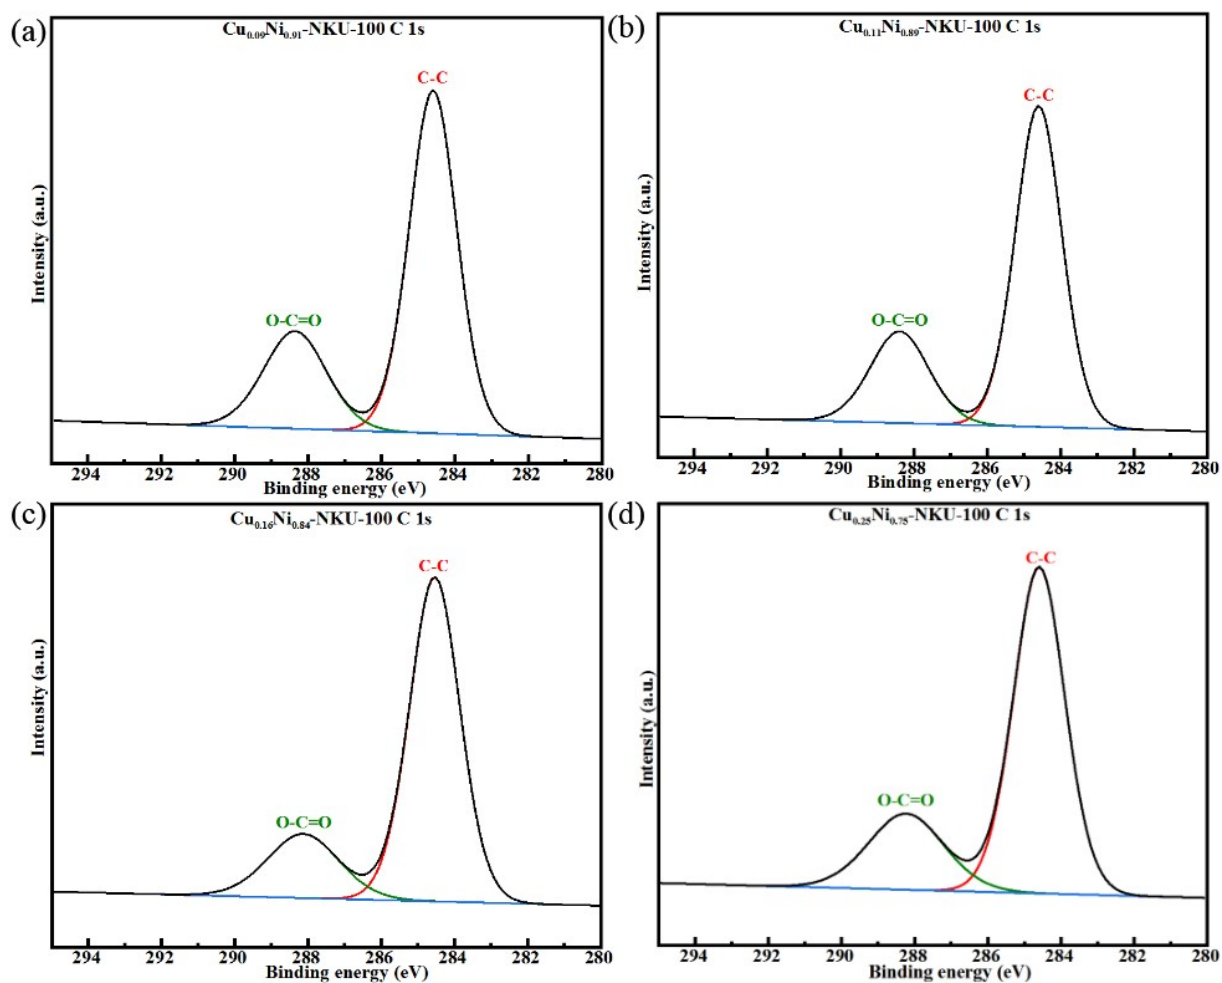

**Fig. S11** High-resolution XPS of C 1s for (a)  $\text{Cu}_{0.09}\text{Ni}_{0.91}\text{-NKU-100}$ , (b)  $\text{Cu}_{0.11}\text{Ni}_{0.89}\text{-NKU-100}$ , (c)  $\text{Cu}_{0.16}\text{Ni}_{0.84}\text{-NKU-100}$  and (d)  $\text{Cu}_{0.25}\text{Ni}_{0.75}\text{-NKU-100}$ .



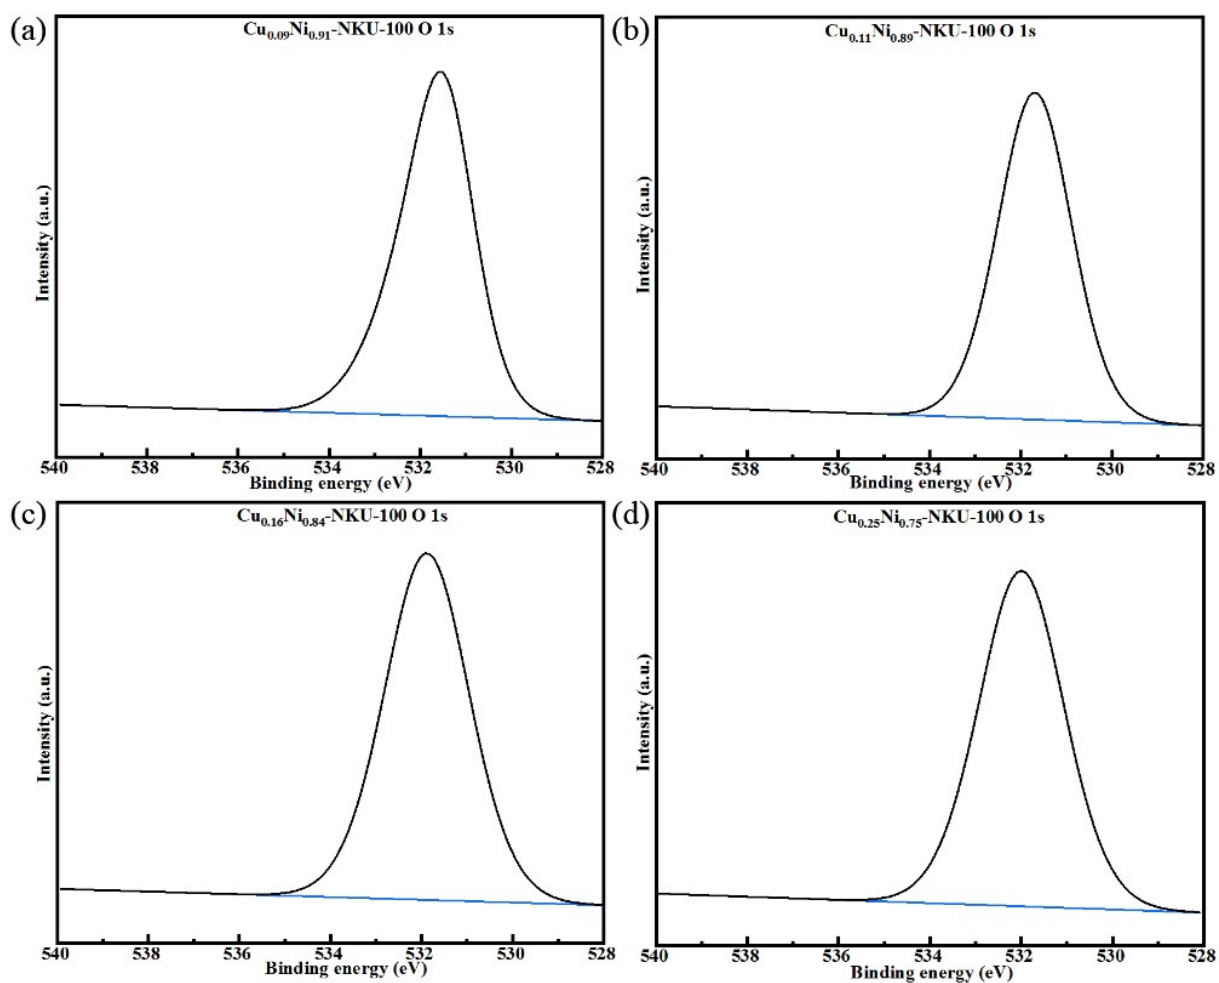

**Fig. S12** High-resolution XPS of O 1s for (a)  $\text{Cu}_{0.09}\text{Ni}_{0.91}\text{-NKU-100}$ , (b)  $\text{Cu}_{0.11}\text{Ni}_{0.89}\text{-NKU-100}$ , (c)  $\text{Cu}_{0.16}\text{Ni}_{0.84}\text{-NKU-100}$  and (d)  $\text{Cu}_{0.25}\text{Ni}_{0.75}\text{-NKU-100}$ .

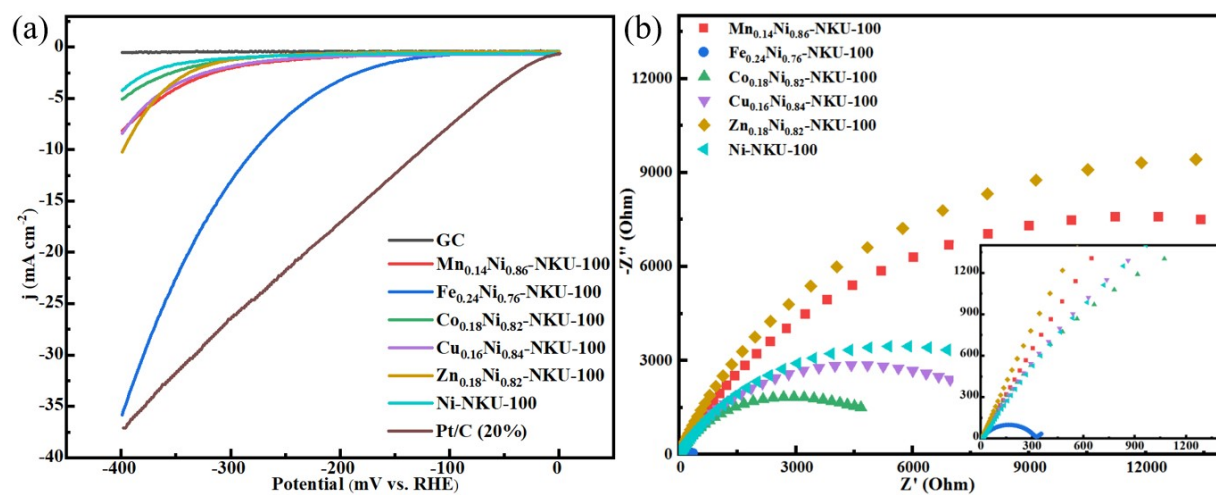

**Fig. S13** (a) LSV curves at a scan rate of 5 mV·s<sup>-1</sup> and (b) EIS Nyquist plots of M<sub>x</sub>Ni<sub>1-x</sub>-NKU-100 (M = Mn, Fe, Co, Cu, Zn) in 1 M NaOH electrolyte.

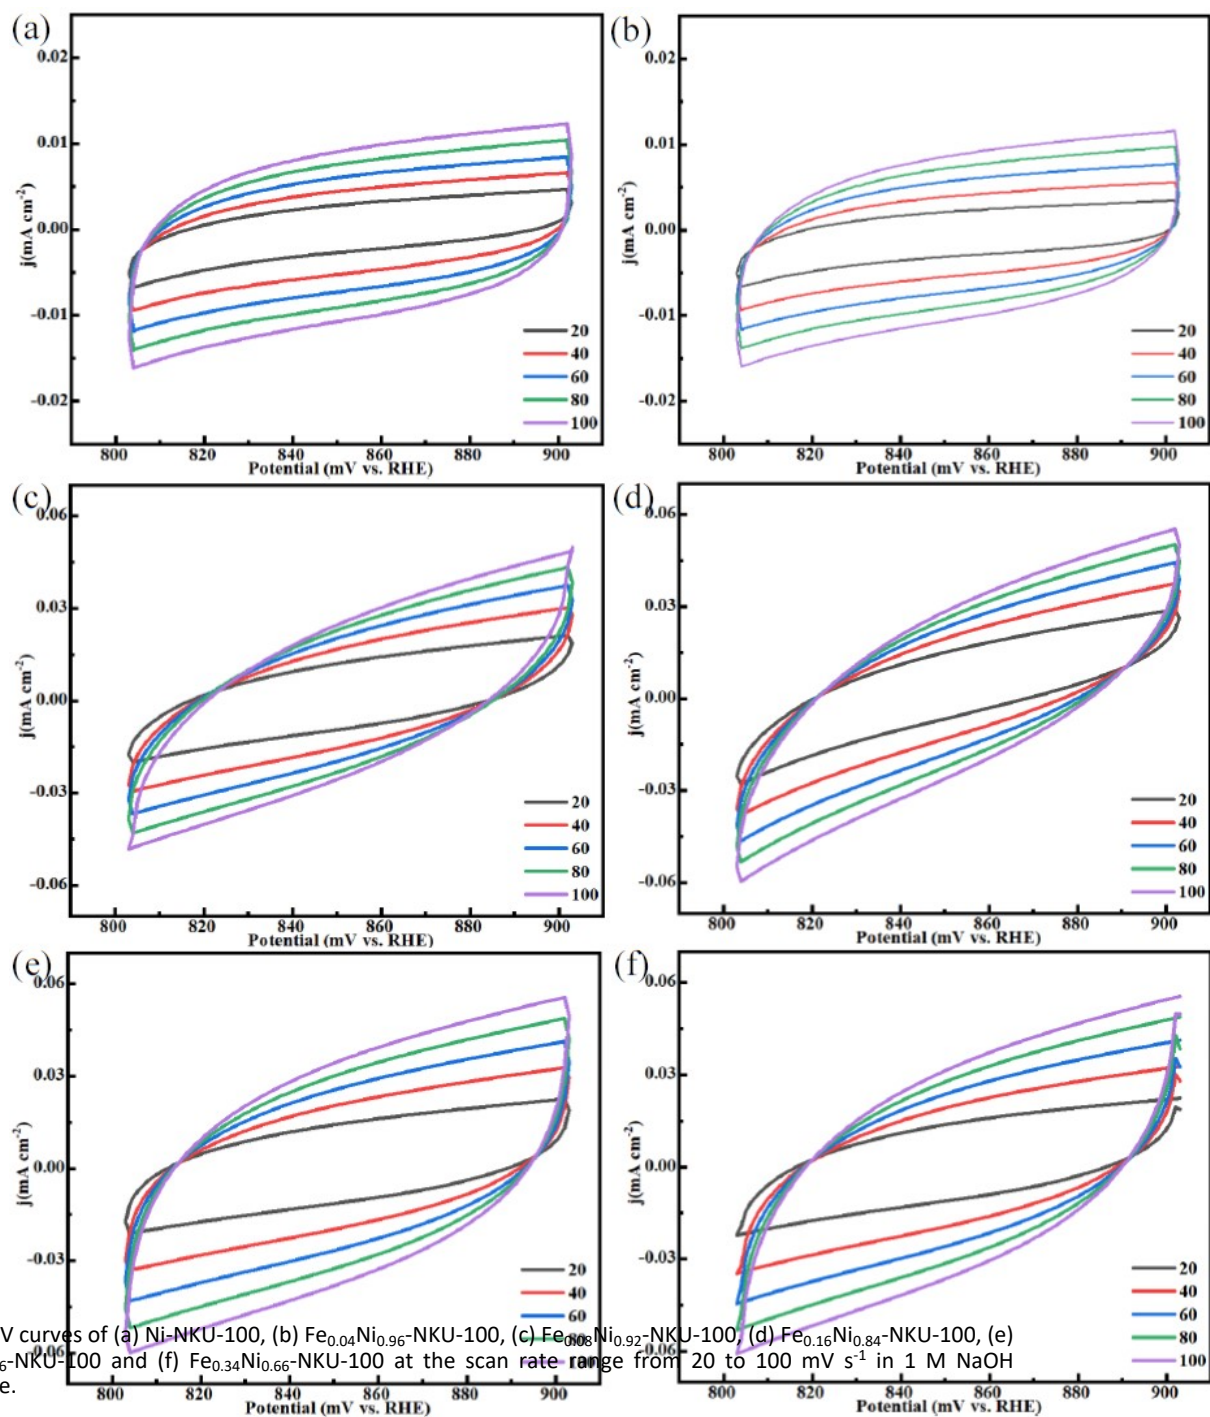

**Fig. S14** CV curves of (a) Ni-NKU-100, (b)  $\text{Fe}_{0.04}\text{Ni}_{0.96}$ -NKU-100, (c)  $\text{Fe}_{0.08}\text{Ni}_{0.92}$ -NKU-100, (d)  $\text{Fe}_{0.16}\text{Ni}_{0.84}$ -NKU-100, (e)  $\text{Fe}_{0.24}\text{Ni}_{0.76}$ -NKU-100 and (f)  $\text{Fe}_{0.34}\text{Ni}_{0.66}$ -NKU-100 at the scan rate range from 20 to 100  $\text{mV s}^{-1}$  in 1 M NaOH electrolyte.

**Tab. S4**  $R_{ct}$  of  $\text{Fe}_x\text{Ni}_{1-x}$ -NKU-100 in 1 M NaOH electrolyte.

| Electrode material                          | $R_{ct}$ ( $\Omega$ ) |
|---------------------------------------------|-----------------------|
| Ni-NKU-100                                  | 35070                 |
| $\text{Fe}_{0.04}\text{Ni}_{0.96}$ -NKU-100 | 2115                  |
| $\text{Fe}_{0.08}\text{Ni}_{0.92}$ -NKU-100 | 577                   |
| $\text{Fe}_{0.16}\text{Ni}_{0.84}$ -NKU-100 | 410                   |
| $\text{Fe}_{0.24}\text{Ni}_{0.76}$ -NKU-100 | 204                   |
| $\text{Fe}_{0.34}\text{Ni}_{0.66}$ -NKU-100 | 809                   |

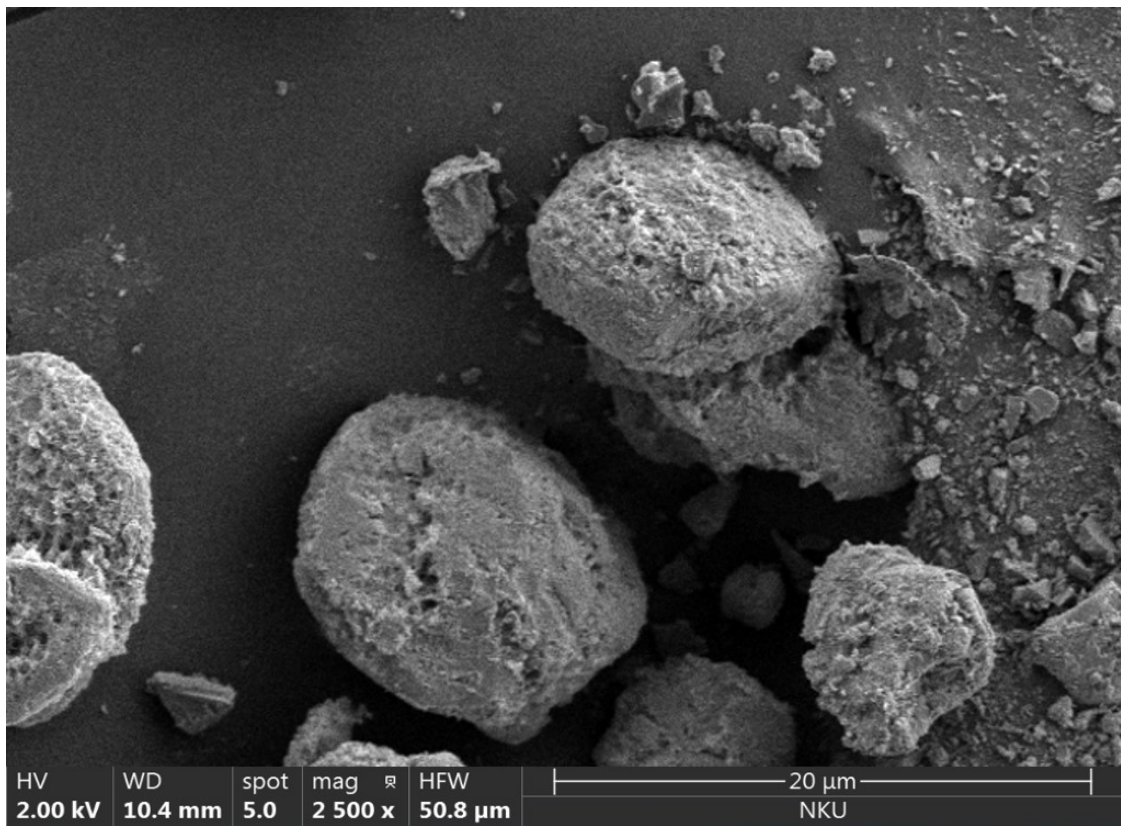

**Fig. S15** SEM images of  $\text{Fe}_{0.24}\text{Ni}_{0.76}\text{-NKU-100}$  after long-time electrocatalytic test in 1 M NaOH electrolyte.

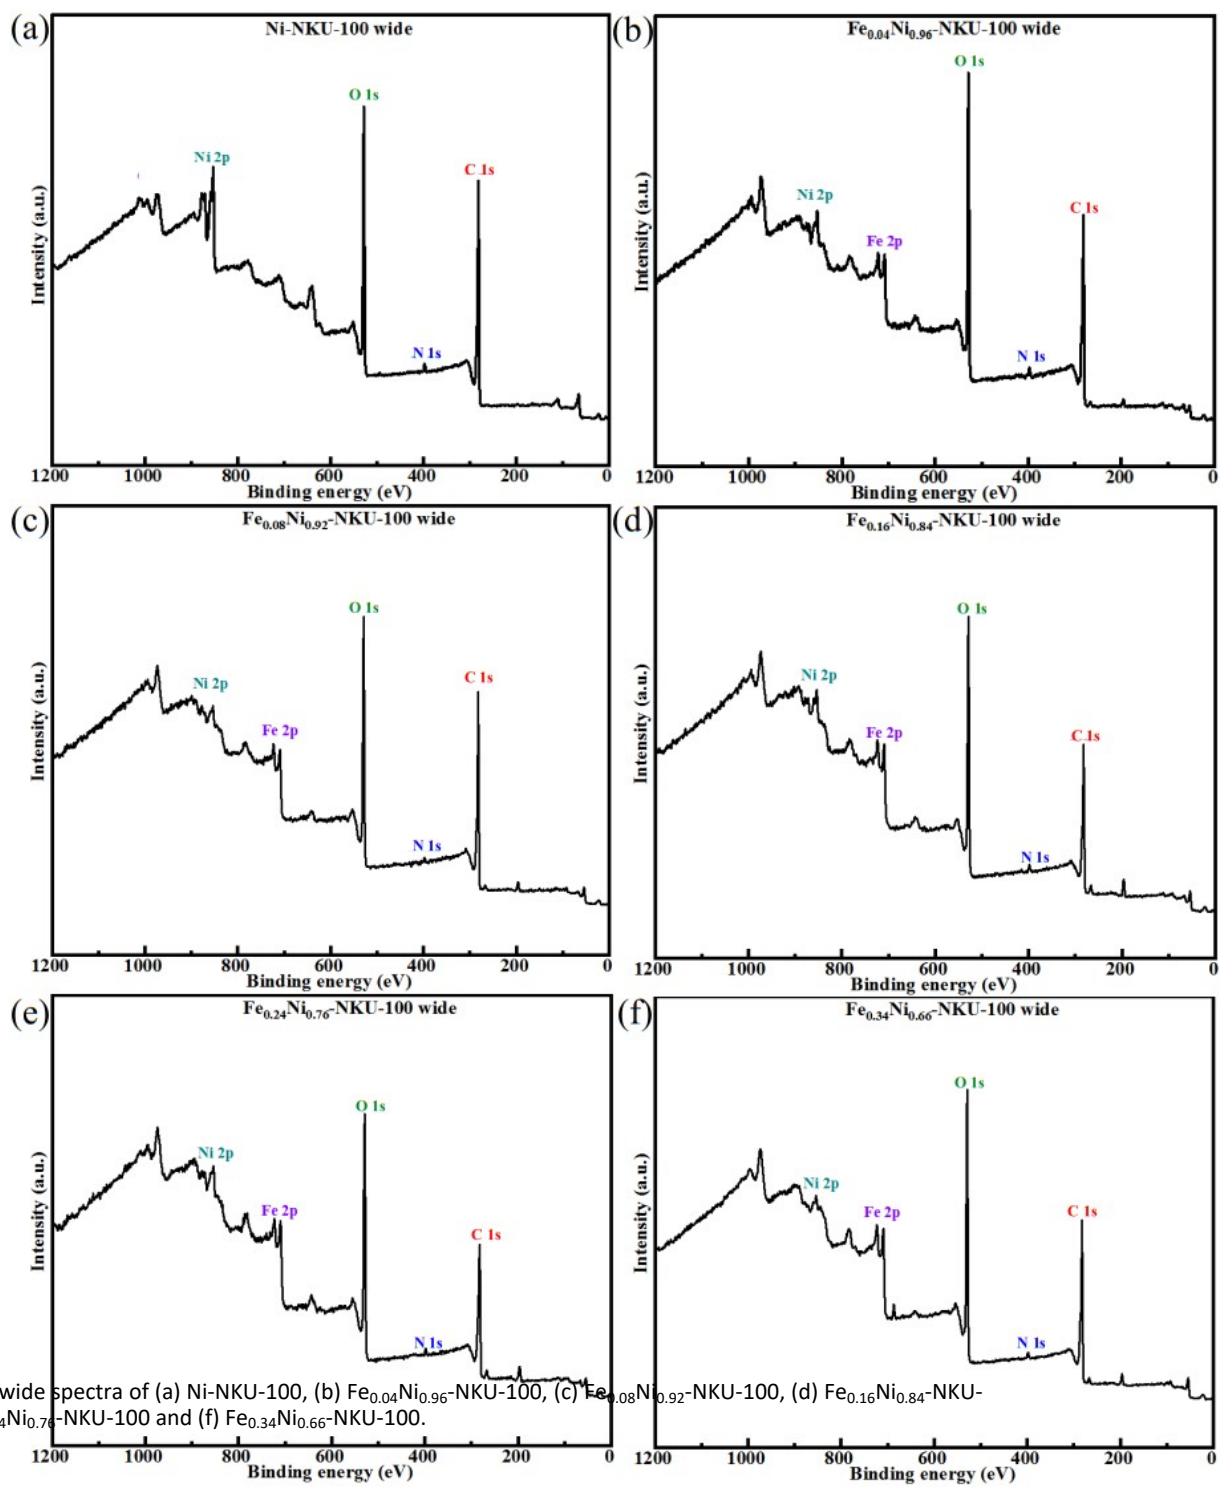

**Fig. S16** XPS wide spectra of (a) Ni-NKU-100, (b)  $\text{Fe}_{0.04}\text{Ni}_{0.96}$ -NKU-100, (c)  $\text{Fe}_{0.08}\text{Ni}_{0.92}$ -NKU-100, (d)  $\text{Fe}_{0.16}\text{Ni}_{0.84}$ -NKU-100, (e)  $\text{Fe}_{0.24}\text{Ni}_{0.76}$ -NKU-100 and (f)  $\text{Fe}_{0.34}\text{Ni}_{0.66}$ -NKU-100.

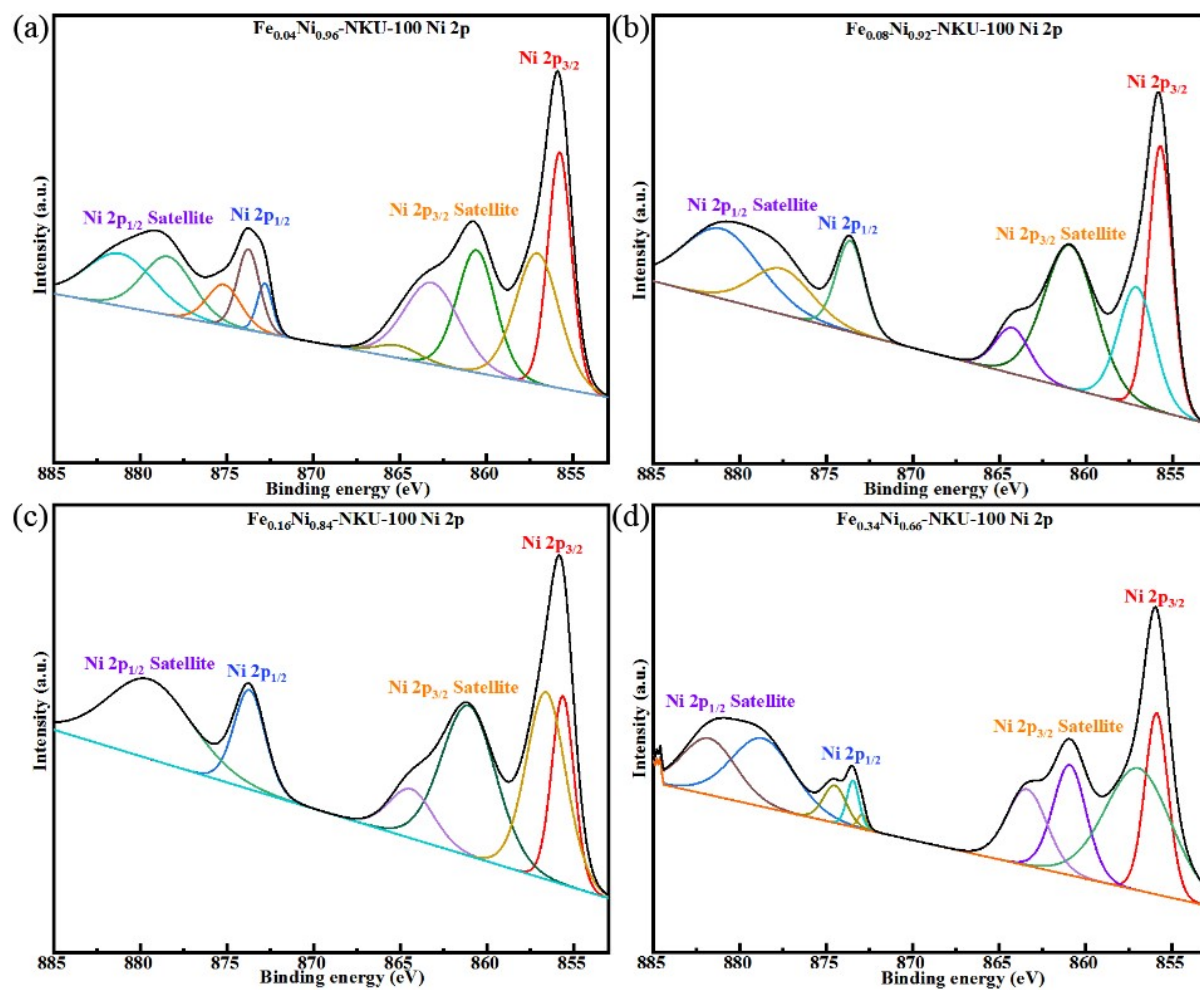

**Fig. S17** High-resolution XPS of Ni 2p for (a) Fe<sub>0.04</sub>Ni<sub>0.96</sub>-NKU-100, (b) Fe<sub>0.08</sub>Ni<sub>0.92</sub>-NKU-100, (c) Fe<sub>0.16</sub>Ni<sub>0.84</sub>-NKU-100 and (d) Fe<sub>0.34</sub>Ni<sub>0.66</sub>-NKU-100.

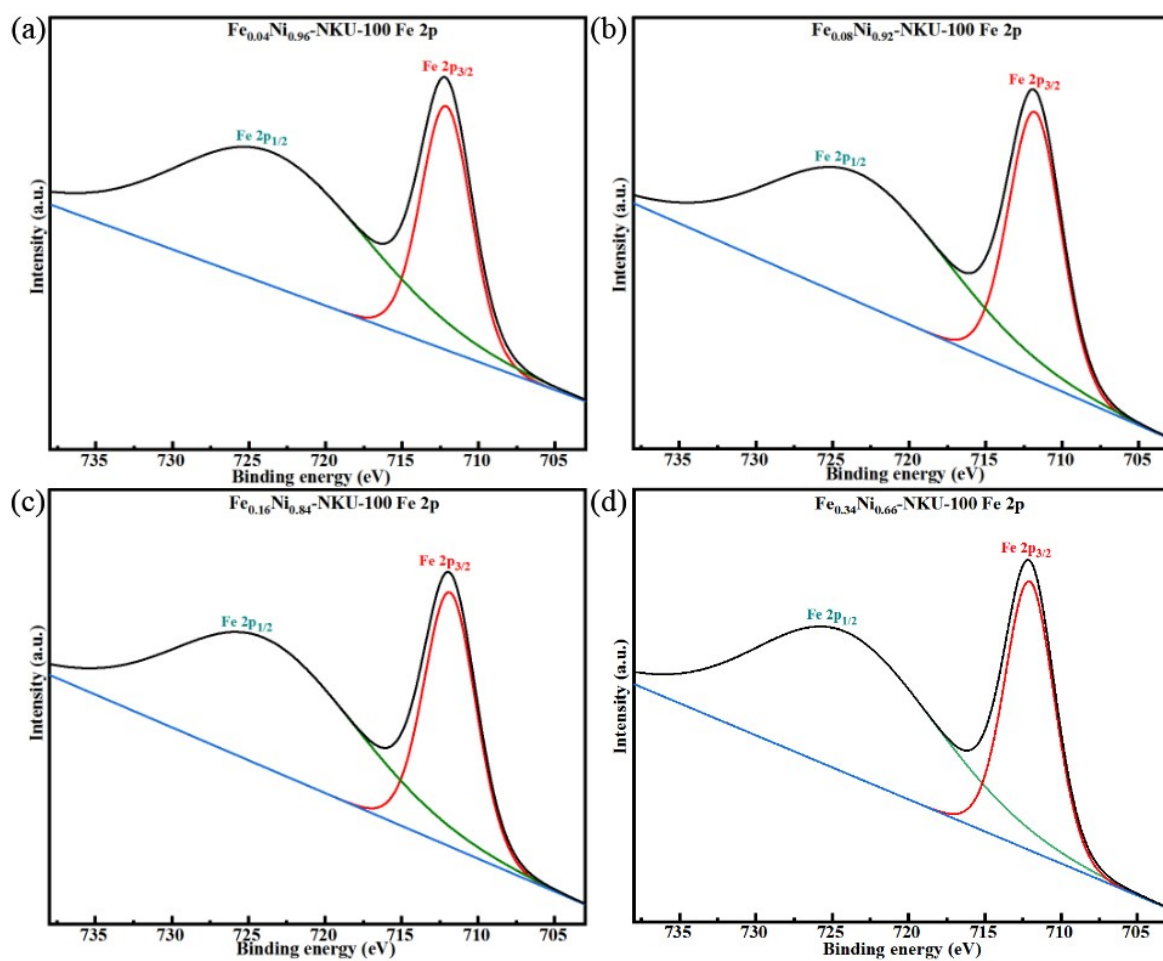

**Fig. S18** High-resolution XPS of Fe 2p for (a)  $\text{Fe}_{0.04}\text{Ni}_{0.96}\text{-NKU-100}$ , (b)  $\text{Fe}_{0.08}\text{Ni}_{0.92}\text{-NKU-100}$ , (c)  $\text{Fe}_{0.16}\text{Ni}_{0.84}\text{-NKU-100}$  and (d)  $\text{Fe}_{0.34}\text{Ni}_{0.66}\text{-NKU-100}$ .



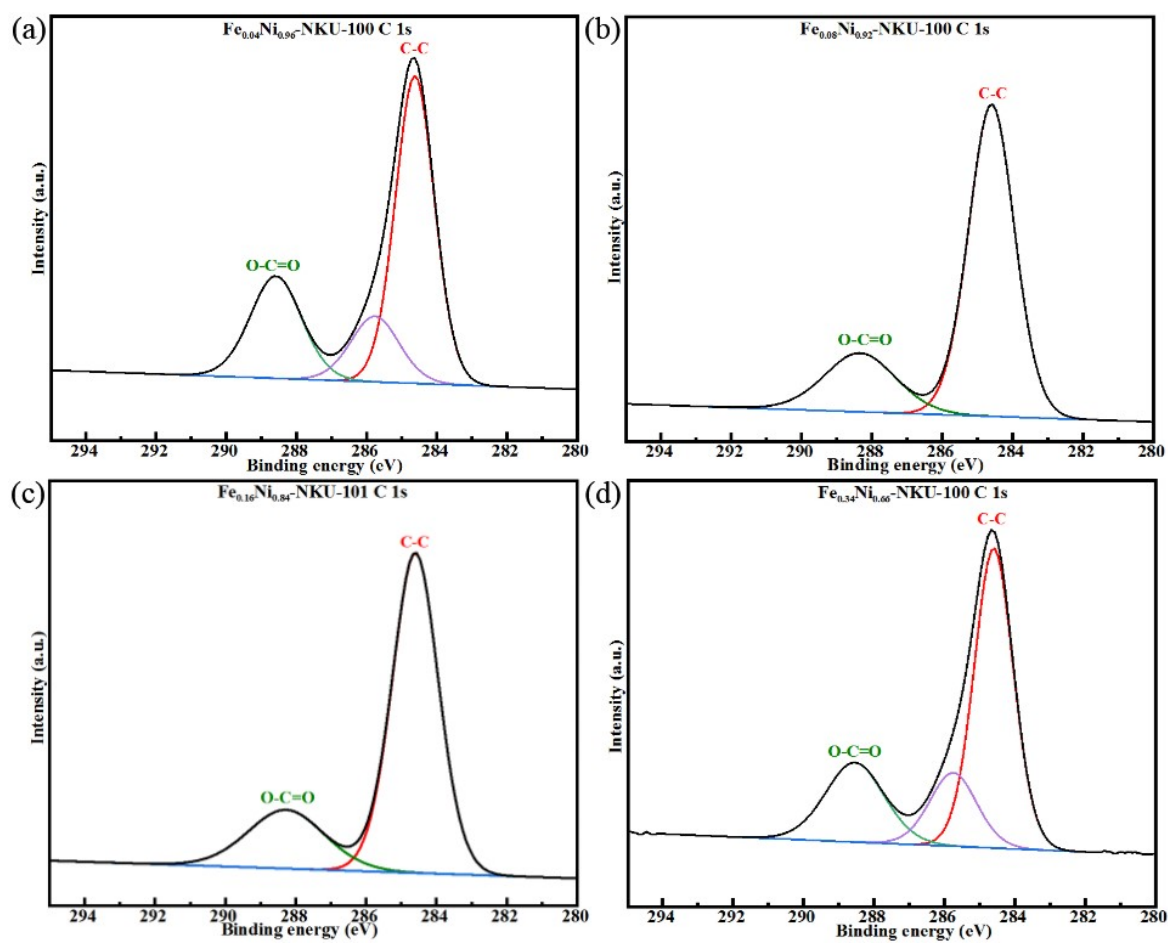

**Fig. S19** High-resolution XPS of C 1s for (a)  $\text{Fe}_{0.04}\text{Ni}_{0.96}\text{-NKU-100}$ , (b)  $\text{Fe}_{0.08}\text{Ni}_{0.92}\text{-NKU-100}$ , (c)  $\text{Fe}_{0.16}\text{Ni}_{0.84}\text{-NKU-101}$  and (d)  $\text{Fe}_{0.34}\text{Ni}_{0.66}\text{-NKU-100}$ .

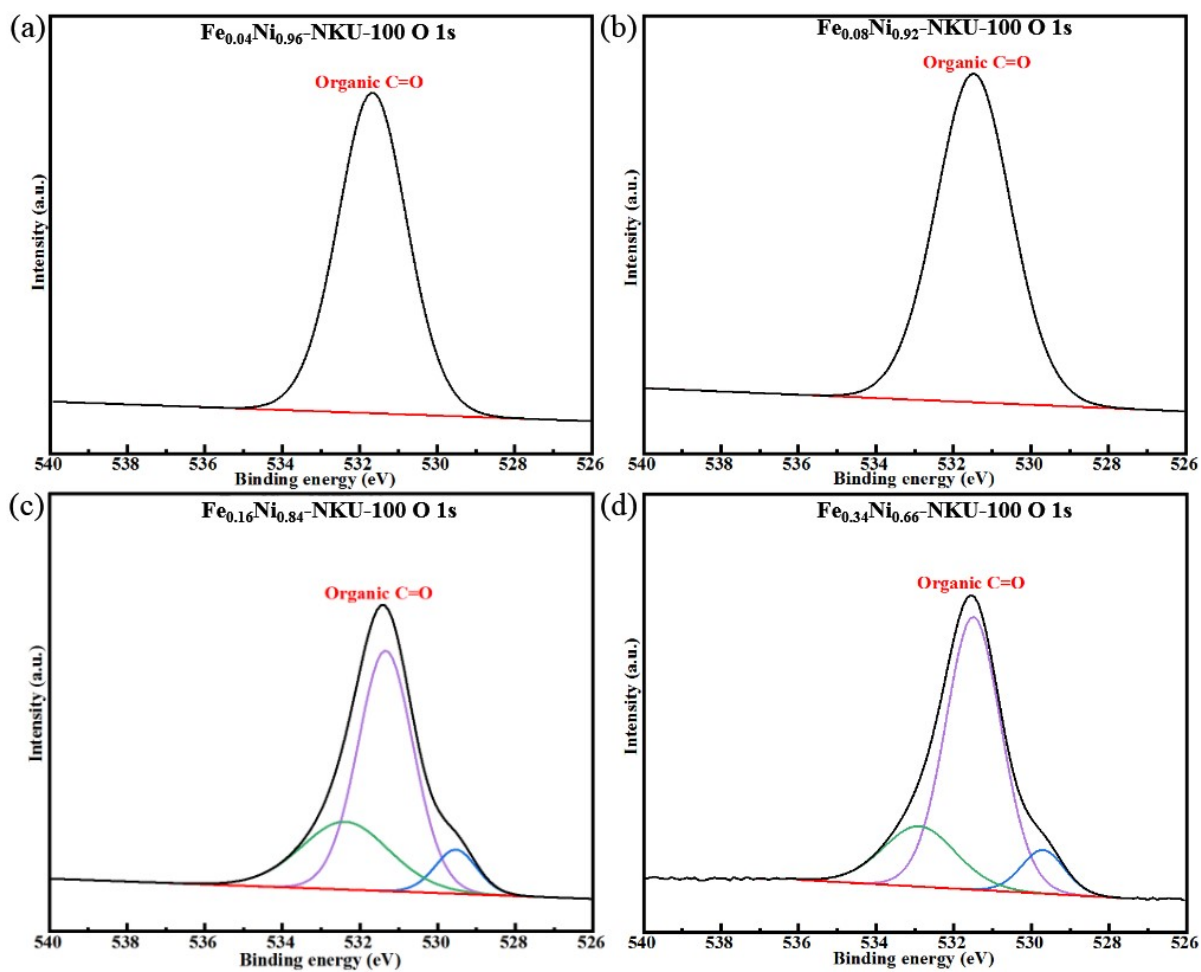

**Fig. S20** High-resolution XPS of O 1s for (a)  $\text{Fe}_{0.04}\text{Ni}_{0.96}\text{-NKU-100}$ , (b)  $\text{Fe}_{0.08}\text{Ni}_{0.92}\text{-NKU-100}$ , (c)  $\text{Fe}_{0.16}\text{Ni}_{0.84}\text{-NKU-100}$  and (d)  $\text{Fe}_{0.34}\text{Ni}_{0.66}\text{-NKU-100}$ .

## References

- 1 X. Wang, J.Y. Luo, J.W. Tian, D.D. Huang, Y.P. Wu, S. Li and D.S. Li, Two new 3D isostructural Co/Ni-MOFs showing four-fold polyrotaxane-like networks: Synthesis, crystal structures and hydrogen evolution reaction, *Inorg. Chem. Comm.*, 2018, **98**, 141–144.
- 2 Y.C. Zhou, W.W. Dong, M.Y. Jiang, Y.P. Wu, D.S. Li, Z.F. Tian and J. Zhao, A new 3D 8-fold interpenetrating 66-dia topological Co-MOF: Syntheses, crystal structure, magnetic properties and electrocatalytic hydrogen evolution reaction, *J. Solid. State. Chem.*, 2019, **279**, 120929.
- 3 R. Dong, Z. Zheng, D.C. Tranca, J. Zhang, N. Chandrasekhar, S. Liu, X. Zhuang, G. Seifert and X. Feng, Immobilizing Molecular Metal Dithiolene-Diamine Complexes on 2D Metal-Organic Frameworks for Electrocatalytic H<sub>2</sub> Production, *Chem. Eur. J.*, 2017, **23**, 2255–2260.
- 4 W. Zhou, Y.P. Wu, X. Wang, J. Wu Tian, D.D. Huang, J. Zhao, Y.Q. Lan and D.S. Li, Improved conductivity of a new Co(II)-MOF by assembled acetylene black for efficient hydrogen evolution reaction, *CrystEngComm*, 2018, **20**, 4804–4809.
- 5 S. Roy, Z. Huang, A. Bhunia, A. Castner, A.K. Gupta, X. Zou and S. Ott, Electrocatalytic Hydrogen Evolution from a Cobaloxime-Based Metal-Organic Framework Thin Film, *J. Am. Chem. Soc.*, 2019, **141**, 15942–15950.
- 6 R. Dong, M. Pfeiffermann, H. Liang, Z. Zheng, X. Zhu, J. Zhang and X. Feng, Large-area, Free-Standing, Two-Dimensional Supramolecular Polymer Single-Layer Sheets for Highly Efficient Electrocatalytic Hydrogen Evolution, *Angew. Chem. Int. Ed.*, 2015, **54**, 12058–12063.
- 7 D.H. He, J.J. Liu, Y. Wang, F. Li, B. Li and J.B. He, Electrocatalysis of the first electron transfer in hydrogen evolution reaction with an atomically precise Cu<sup>II</sup>-organic framework catalyst, *Electrochim. Acta.*, 2019, **308**, 285–294.
- 8 J.S. Qin, D.Y. Du, W. Guan, X.J. Bo, Y.F. Li, L.P. Guo, Z.M. Su, Y.Y. Wang, Y.Q. Lan and H.C. Zhou, Ultrastable Polymolybdate-Based Metal-Organic Frameworks as Highly Active Electrocatalysts for Hydrogen Generation from Water, *J. Am. Chem. Soc.*, 2015, **137**, 7169–7177.
- 9 I. Hod, P. Deria, W. Bury, J.E. Mondloch, C.W. Kung, M. So, M.D. Sampson, A.W. Peters, C.P. Kubiak, O. K. Farha and J. T. Hupp, A porous proton-relaying metal-organic framework material that accelerates electrochemical hydrogen evolution, *Nat. Commun.*, 2015, **6**, 8304.
- 10 X.F. Li, M.Y. Lu, H.Y. Yu, T.H. Zhang, J. Liu, J.H. Tian and R. Yang, Copper-Metal Organic Frameworks Electrodeposited on Carbon Paper as an Enhanced Cathode for the Hydrogen Evolution Reaction, *ChemElectroChem.*, 2019, **6**, 4507–4510.
- 11 R.-Z. Zhang, L.-L. Lu, Z.-H. Chen, X. Zhang, B.-Y. Wu, W. Shi and P. Cheng, Bimetallic Cage-Based Metal-Organic Frameworks for Electrochemical Hydrogen Evolution Reaction with Enhanced Activity, *Chem. Eur. J.*, 2022, **28**, **28**, e202200401.
- 12 D. Zhu, J. Liu, Y. Zhao, Y. Zheng and S.Z. Qiao, Engineering 2D Metal–Organic Framework/MoS<sub>2</sub> Interface for Enhanced Alkaline Hydrogen Evolution, *Small*, 2019, **15**, 1805511.
- 13 J. Duan, S. Chen and C. Zhao, Ultrathin metal-organic framework array for efficient electrocatalytic water splitting, *Nat. Commun.*, 2017, **8**, 15341.
- 14 S.N. Shreyanka, J. Theerthagiri, S.J. Lee, Y. Yu and M.Y. Choi, Multiscale design of 3D metal–organic frameworks (M–BTC, M: Cu, Co, Ni) via PLAL enabling bifunctional electrocatalysts for robust overall water splitting, *Chem. Eng. J.*, 2022, **446**, 137045.
- 15 B. Geng, F. Yan, X. Zhang, Y. He, C. Zhu, S.-L. Chou, X. Zhang and Y. Chen, Conductive CuCo-Based Bimetal Organic Framework for Efficient Hydrogen Evolution, *Adv. Mater.*, 2021, **33**, 2106781.

- 16 W. Cheng, H. Zhang, D. Luan and X.W. (David) Lou, Exposing unsaturated Cu<sub>1</sub>-O<sub>2</sub> sites in nanoscale Cu-MOF for efficient electrocatalytic hydrogen evolution, *Sci. Adv.*, 2021, **7**, eabg2580.
- 17 M. Gu, S.-C. Wang, C. Chen, D. Xiong and F.-Y. Yi, Iron-Based Metal–Organic Framework System as an Efficient Bifunctional Electrocatalyst for Oxygen Evolution and Hydrogen Evolution Reactions, *Inorg. Chem.*, 2020, **59**, **9**, 6078–6086.
- 18 H. Huang, Y. Zhao, Y. Bai, F. Li, Y. Zhang and Y. Chen, Conductive Metal–Organic Frameworks with Extra Metallic Sites as an Efficient Electrocatalyst for the Hydrogen Evolution Reaction, *Adv. Sci.*, 2020, **7**, 2000012.
